# Supplementary material for: Fluoroalkyl-grafted methacrylate-PDMS membranes using fluoromonomer as a diluent for enhancing biobutanol pervaporation
Source: Royal Society of Chemistry journal article supplement (doi:10.1039/d1gc02212a), 2021-01-01
Supplement: d1gc02212a1.pdf [file d1gc02212a1.pdf]

# Supporting Information

## Fluoroalkyl-grafted methacrylate-PDMS membrane using fluoromonomer as diluent for enhancing biobutanol pervaporation

Zhihao Si<sup>a,1</sup>, Yaqi Wang<sup>a,1</sup>, Chang Liu<sup>a</sup>, Tanlong Xue<sup>b</sup>, Shuai Yang<sup>a</sup>, Guozhen Li<sup>a</sup>, Changwei Zhang<sup>a</sup>, Bo Chen<sup>c</sup>, Di Cai<sup>a</sup>, Peiyong Qin<sup>a,\*</sup>

<sup>a</sup>National Energy R&D Center for Biorefinery, Beijing University of Chemical Technology, Beijing 100029, PR China

<sup>b</sup>State Key Laboratory of Chemical Resource Engineering & Beijing Laboratory of Biomedical Materials, Beijing University of Chemical Technology, Beijing 100029, PR China

<sup>c</sup>Systems, Power and Energy Research Division, James Watts School of Engineering, College of Science and Engineering, James Watt South, University of Glasgow, Glasgow G128QQ, UK

<sup>1</sup>These authors contributed equally to this paper.

\*Corresponding authors: [qinpeiyong@tsinghua.org.cn](mailto:qinpeiyong@tsinghua.org.cn) (P. Qin)

**Table S1** Solvents and preparation time used in the preparation of PDMS pervaporation membranes.

| Membrane material | Solvent            | Solvent content (wt%) | Preparation time (h) | Separation system | Ref. |
|-------------------|--------------------|-----------------------|----------------------|-------------------|------|
| PDMS              | <i>n</i> -Heptane  | 90.05                 | 24                   | Ethanol-water     | 1    |
| PDMS              | <i>n</i> -Heptane  | 90.87                 | 36                   | Ethanol-water     | 2    |
| PDMS              | <i>n</i> -Hexane   | 45                    | 24                   | Butanol-water     | 3    |
| PDMS              | <i>n</i> -Heptane  | 89                    | 31                   | Ethanol-water     | 4    |
| PDMS              | <i>n</i> -Hexane   | 45                    | 24                   | Butanol-water     | 5    |
| PDMS              | <i>n</i> -Hexane   | 89.26                 | 5                    | Ethanol-water     | 6    |
| PDMS              | <i>n</i> -Hexane   | 90.00                 | 24                   | Butanol-water     | 7    |
| PDMS              | <i>n</i> -Heptane  | 33.3                  | 24                   | Desulfurization   | 8    |
| PDMS              | <i>n</i> -Heptane  | 20                    | 3                    | Butanol-water     | 9    |
| PDMS              | <i>n</i> -Hexane   | 90.00                 | 24                   | Ethanol-water     | 10   |
| PDMS              | <i>iso</i> -Octane | 88.24                 | 46                   | Butanol-water     | 11   |

## Preparation of ABE fermentation broth

Butanol fermentation broth can be obtained based on the method in our previous study.<sup>12,13</sup>

*Clostridium acetobutylicum* ABE 1201 was adopted. The culture medium contained 60 g L<sup>-1</sup> glucose, 1 g L<sup>-1</sup> KH<sub>2</sub>PO<sub>4</sub>/K<sub>2</sub>HPO<sub>4</sub>, 1 mg L<sup>-1</sup> *p*-aminobenzoic acid, 0.01 mg L<sup>-1</sup> biotin as vitamins, and 2.2 g L<sup>-1</sup> ammonium acetate, 0.2 g L<sup>-1</sup> MgSO<sub>4</sub>·7H<sub>2</sub>O, 10 mg L<sup>-1</sup> MnSO<sub>4</sub>·H<sub>2</sub>O, and 10 mg L<sup>-1</sup> FeSO<sub>4</sub>·7H<sub>2</sub>O. Anaerobic environment for fermentation was achieved by bubbling the nitrogen from the bottom of flask for 15 min. Before inoculation, the medium was sterilized by autoclaving at 116 °C for 25 min. 10 % of inoculation size was adopted. Batch fermentation was carried out at 37 °C without stirring for 96 h. The fermentation broth was used as the feed for pervaporation without cells separation. Because of the co-generation of organic acids as by-product, pH of the broth to be pervaporative separation was decreased to ~4.3 from 7 in the initial medium.

**Table S2** Current advances of pervaporation performances of various polymeric membranes in literatures for butanol separation.

| Membrane                 | Feed temp. (°C) | Feed conc. (wt%) | Separation factor | Total flux (g m <sup>-2</sup> h <sup>-1</sup> ) | Permeation conc. (wt%) | <i>PSI</i> | Ref.       |
|--------------------------|-----------------|------------------|-------------------|-------------------------------------------------|------------------------|------------|------------|
| PDMS                     | 40              | 1                | 26                | 457                                             | 20.8                   | 11425      | 14         |
| PDMS                     | 60              | 3                | 13.4              | 1065                                            | 29.3                   | 13206      | 15         |
| PDMS                     | 60              | 1                | ~43               | 680                                             | 30.1                   | 28560      | 16         |
| PDMS                     | 40              | 1                | 26.1              | 457                                             | 20.6                   | 11400      | 17         |
| PDMS                     | 40              | 1                | 42                | 770                                             | 29.8                   | 31570      | 18         |
| PDMS                     | 37              | 1                | 27.6              | 810                                             | 21.8                   | 21546      | 19         |
| PDMS                     | 80              | 1.5              | 18.7              | 435.4                                           | 22.1                   | 7707       | 20         |
| PDMS                     | 30              | 1                | 42                | 53                                              | 29.8                   | 2173       | 21         |
| PDMS                     | 37              | 1.5              | 8                 | 38.8                                            | 10.9                   | 272        | 22         |
| PDMS                     | 37              | 1.26             | 16.2              | 951                                             | 17.4                   | 14455      | 1          |
| SBR <sup>a</sup>         | 30              | 1                | 9                 | 40                                              | 8.3                    | 320        | 23         |
| EPDM <sup>b</sup>        | 30              | 1                | 6                 | 24                                              | 5.7                    | 120        | 23         |
| PEBA <sup>c</sup>        | 23              | 1                | 12                | 32                                              | 10.8                   | 352        | 24         |
| PUR <sup>d</sup>         | 50              | 1                | 10                | 88                                              | 9.2                    | 792        | 25         |
| PTFE <sup>e</sup>        | 50              | 1                | 10                | 805                                             | 9.2                    | 7245       | 26         |
| PTFE <sup>e</sup>        | 38              | 1.3              | 8.5               | 170                                             | 9.9                    | 1275       | 26         |
| PERVAP-1060 <sup>f</sup> | 40              | 1                | 27                | 300                                             | 21.4                   | 7800       | 27         |
| PDMS                     | 30              | 1                | 43.1              | 159.6                                           | 30                     | 6719       | 28         |
| PDMS                     | 37              | 1.5              | 14.6              | 1306.9                                          | 18.2                   | 17774      | 29         |
| PDMS                     | 40              | 1                | 38.6              | 282                                             | 28.0                   | 10603      | 30         |
| PDMS                     | 37              | 1                | 23.5              | 890                                             | 19.2                   | 20025      | 19         |
| PDMS                     | 60              | 1                | 32                | 1375                                            | 24.4                   | 42625      | 31         |
| PDMS                     | 37              | 1                | 34                | 95                                              | 25.6                   | 3135       | 32         |
| MA-PDMS                  | 60              | 1                | 38                | 594                                             | 28.7                   | 22141      | This study |

|                |    |   |    |      |      |       |               |
|----------------|----|---|----|------|------|-------|---------------|
| MA-PDMS-<br>F1 | 60 | 1 | 41 | 862  | 30.5 | 34452 | This<br>study |
| MA-PDMS-<br>F2 | 60 | 1 | 39 | 1066 | 28.6 | 40868 | This<br>study |
| MA-PDMS-<br>F3 | 60 | 1 | 34 | 1216 | 25.5 | 40062 | This<br>study |

<sup>a</sup>Styrene butadiene rubber (SBR).

<sup>b</sup>Propylene diene rubber (EPDM).

<sup>c</sup>Poly(ether block amide) (PEBA).

<sup>d</sup>Polyurethane (PUR).

<sup>e</sup>Polytetrafluoroethylene (PTFE).

<sup>f</sup>GFT PDMS membrane (PERVAP-1060).

**Table S3** Comparison of pervaporation performance of PDMS based membranes for separating ABE fermentation broth.

| Membrane                | Feed concentration (g L <sup>-1</sup> ) |                  |                  | Flux<br>(g m <sup>-2</sup> h <sup>-1</sup> ) | Separation factor |         |         | Ref.      |
|-------------------------|-----------------------------------------|------------------|------------------|----------------------------------------------|-------------------|---------|---------|-----------|
|                         | Butanol                                 | Ethanol          | Acetone          |                                              | Butanol           | Ethanol | Acetone |           |
| PDMS                    | 15                                      | 2.5              | 7.5              | 120.2                                        | 13.7              | 4.8     | 23.2    | 33        |
| PDMS                    | -                                       | -                | -                | 621                                          | 19.8              | 10.1    | 33.4    | 34        |
| PDMS                    | 7.58                                    | 0.53             | 3.77             | 783.91                                       | 10.28             | 2.92    | -       | 35        |
| PDMS                    | 11                                      | 2                | 6                | 670                                          | 15.1              | 6.7     | 20.6    | 1         |
| PDMS                    | 11.5                                    | 2.3              | 5.6              | 816                                          | 18.2              | 4.1     | 17.5    | 36        |
| PPhS <sup>a</sup> /PDMS | -                                       | -                | -                | 284.94                                       | 34.03             | 14.05   | 5.03    | 28        |
| PDMS                    | 11.3                                    | 1.5              | 3.2              | 840                                          | 13.99             | 7.22    | 18.11   | 37        |
| PDMS                    | 2.7                                     | 0.8              | 0.6              | 349                                          | 14.3              | 8.7     | 36.6    | 38        |
| MA-PDMS-F1              | 1.25 <sup>b</sup>                       | 0.3 <sup>b</sup> | 0.6 <sup>b</sup> | 803                                          | 32.0              | 7.8     | 25.1    | This work |
| MA-PDMS-F2              | 12.1 <sup>b</sup>                       | 0.3 <sup>b</sup> | 0.6 <sup>b</sup> | 997                                          | 29.6              | 7.2     | 22.6    | This work |

<sup>a</sup>Polyphenylsiloxane (PPhS).

<sup>b</sup>Unit with wt%

## Supplementary references

- 1 G. Liu, W. Wei, H. Wu, X. Dong, M. Jiang and W. Jin, *J. Membr. Sci.*, 2011, **373**, 121-129.
- 2 F. Xiangli, Y. Chen, W. Jin and N. Xu, *Ind. Eng. Chem. Res.*, 2007, **46**, 2224-2230.
- 3 Z. Si, D. Cai, S. Li, G. Li, Z. Wang and P. Qin, *Sep. Purif. Technol.*, 2019, **221**, 286-293.
- 4 H. Yin, A. Khosravi, L. O'Connor, A. Q. Tagaban, L. Wilson, B. Houck, Q. Liu and M. L. Lind, *Ind. Eng. Chem. Res.*, 2017, **56**, 9167-9176.
- 5 S. Li, Z. Chen, Y. Yang, Z. Si, P. Li, P. Qin and T. Tan, *Sep. Purif. Technol.*, 2019, **215**, 163-172.
- 6 D. M. Aguilar-Valencia, M. A. Gómez-García and J. Fontalvo, *Ind. Eng. Chem. Res.*, 2012, **51**, 9328-9334.
- 7 Z. Si, S. Hu, D. Cai, P. Qin and Q. Xu, *RSC Adv.*, 2018, **8**, 5127-5135.
- 8 G. Liu, T. Zhou, W. Liu, S. Hu, F. Pan, H. Wu, Z. Jiang, B. Wang, J. Yang and X. Cao, *J. Mater. Chem. A.*, 2014, **2**, 12907-12917.
- 9 H. Mao, H. Zhen, A. Ahmad, S. Li, Y. Liang, J. Ding, Y. Wu, L. Li and Z. Zhao, *J. Membr. Sci.*, 2019, **582**, 307-321.
- 10 Z. Si, H. Shan, S. Hu, D. Cai and P. Qin, *Chem. Eng. Res. Des.*, 2018, **136**, 324-333.
- 11 X. Liu, Y. Li, Y. Liu, G. Zhu, J. Liu and W. Yang, *J. Membr. Sci.*, 2011, **369**, 228-232.
- 12 D. Cai, Z. Chang, L. Gao, C. Chen, Y. Niu, P. Qin, Z. Wang and T. Tan, *Chem. Eng. J.*, 2015, **277**, 176-185.

- 13 D. Cai, T. Zhang, J. Zheng, Z. Chang, Z. Wang, P. Qin and T. Tan, *Bioresour. Technol.*, 2013, **145**, 97-102.
- 14 G. Liu, F. Xiangli, W. Wei, S. Liu and W. Jin, *Chem. Eng. J.*, 2011, **174**, 495-503.
- 15 J. Li, S. Ji, G. Zhang and H. Guo, *Langmuir.*, 2013, **29**, 8093-8102.
- 16 X. Wang, J. Chen, M. Fang, T. Wang, L. Yu and J. Li, *Sep. Purif. Technol.*, 2016, **163**, 39-47.
- 17 G. Liu, D. Hou, W. Wang, F. Xiangli and W. Jin, *Chin. J. Chem. Eng.*, 2011, **19**, 40-44.
- 18 Y. Pan, Y. Hang, X. Zhao, G. Liu and W. Jin, *J. Membr. Sci.*, 2019, **579**, 210-218.
- 19 H. Zhu, X. Li, Y. Pan, G. Liu, H. Wu, M. Jiang and W. Jin, *J. Membr. Sci.*, 2020, **609**, 118225.
- 20 C. Xue, D. Yang, G. Du, L. Chen, J. Ren and F. Bai, *Biotechnol. Biofuels.*, 2015, **105**, DOI: 10.1186/s13068-015-0288-x.
- 21 J. Huang and M. M. Meagher, *J. Membr. Sci.*, 2001, **192**, 231-242.
- 22 C. Xue, G. Du, L. Chen, J. Ren, J. Sun, F. Bai and S. Yang, *Sci. Rep.*, 2014, **4**, 5925.
- 23 K. D. Jitesh, V. G. Pangarkar and K. Niranjana, *Bioseparation.*, 2000, **9**, 145-154.
- 24 F. Liu, L. Liu and X. Feng, *Sep. Purif. Technol.*, 2005, **42**, 273-282.
- 25 K. W. Böddeker, G. Bengtson, H. Pingel, *J. Membr. Sci.*, 1990, **54**, 1-12.
- 26 D. L. Vrana, M. M. Meagher, R. W. Hutkins and B. Duffield, *Sep. Sci. Technol.*, 1993, **28**, 2167-2178.
- 27 A. Jonquière and A. Fane, *J. Membr. Sci.*, 1997, **125**, 245-255.
- 28 K. Y. Jee and Y. T. Lee, *J. Membr. Sci.*, 2014, **456**, 1-10.



- 29 C. Cheng, D. Yang, M. Bao and C. Xue, *J. Appl. Polym. Sci.*, 2021, **138**, 49738.
- 30 H. Mao, S. Li, A. Zhang, L. Xu, J. Lu and Z. Zhao, *J. Membr. Sci.*, 2020, **595**, 117543.
- 31 P. Zheng, X. Li, J. Wu, N. Wang, J. Li and Q. An, *J. Membr. Sci.*, 2018, **548**, 215-222.
- 32 S. Li, R. Srivastava and R. S. Parnas, *J. Membr. Sci.*, 2010, **363**, 287-294.
- 33 C. Xue, G. Du, L. Chen, J. Ren and F. Bai, *J. Biotechnol.*, 2014, **188**, 158-165.
- 34 W. V. Hecke, T. Hofmann and H. D. Wever, *Bioresour. Technol.*, 2013, **129**, 421-429.
- 35 C. Chen, Z. Xiao, X. Tang, H. Cui, J. Zhang, W. Li and C. Ying, *Bioresour. Technol.*, 2013, **128**, 246-251.
- 36 Z. Si, D. Cai, S. Li, C. Zhang, P. Qin and T. Tan, *J. Membr. Sci.*, 2019, **579**, 309-317.
- 37 H. Wu, X. Chen, G. Liu, M. Jiang, T. Guo, W. Jin, P. Wei and D. Zhu, *Bioprocess Biosyst. Eng.*, 2012, **35**, 1057-1065.
- 38 W. V. Hecke, P. Vandezande, S. Claes, S. Vangeel, H. Beckers, L. Diels and H. D. Wever, *Bioresour. Technol.*, 2012, **111**, 368-377.
